# Supplementary material
Source: publisher site journal article supplement (https://www.spandidos-publications.com/3422/downloadSupplementary)

Figure S1. PCA of non-metastatic and metastatic NSCLC tissue samples. PCA was used to assess the grouping of samples. PCA, principal components analysis. Comp1: 0.97 represents the contribution rate of principal component 1 accounting for 97%; Comp2: 0.009 represents a 0.9% contribution rate of principal component 2.

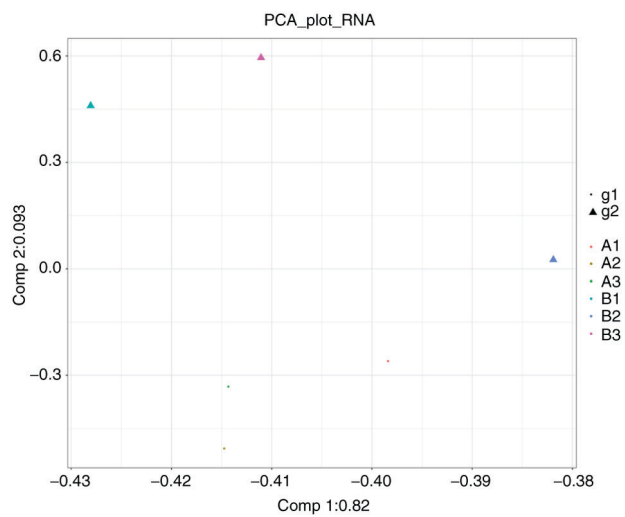

Supplement: Supplementary file 1 [file downloadSupplementary]
